# Supplementary material
Source: publisher site journal article supplement (https://www.dovepress.com/article/258370)

**Supplementary Figure 1. The sensitivity of miRNAs to circPRKCA regulation in NSCLC cells *in vitro***. (A, B) RT-qPCR measured expression levels of miR-1299, miR-197, miR-1231, miR-598, and miR-330-5p in A549 and H1299 cells transfected with si-NC or si-circPRKCA#3. **P* <0.05.


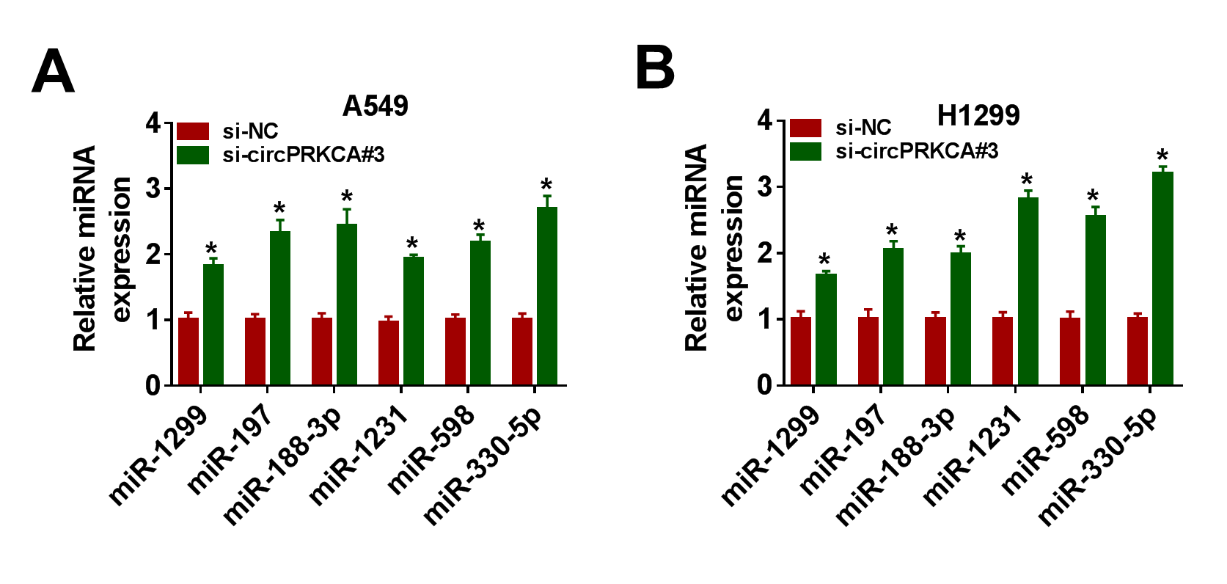


**Supplementary Figure 2. The transwell and FCM images in rescue experiments.** Transwell assays and FCM measured A549 and H1299 cells (A-C) transfected with si-NC alone and si-circPRKCA#3 alone or together with miR-330-5p inhibitor in-miR-330-5p or in-miR-NC, and (D-F) transfected with miR-NC alone and miR-330-5p alone or combined with PDK1 vector or pcDNA.


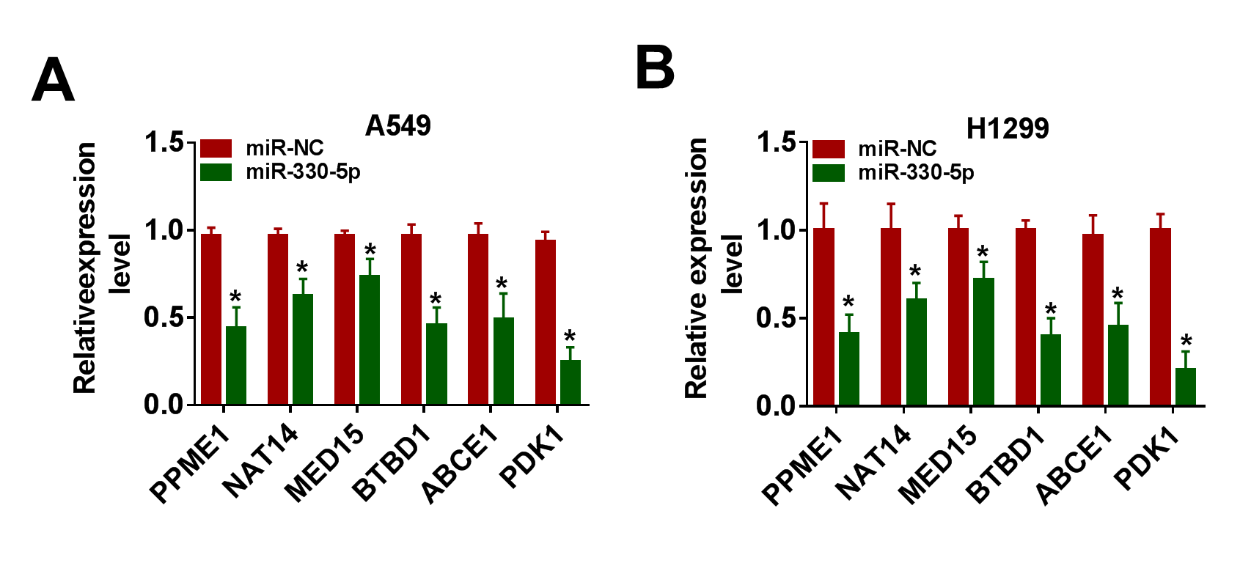


**Supplementary Figure 3. The sensitivity of mRNAs to miR-330-5p regulation in NSCLC cells *in vitro***. (A, B) RT-qPCR measured expression levels of protein phosphatase methylesterase 1 (PPME1), N-acetyltransferase 14 (NAT14), mediator complex subunit 15 (MED15), BTB domain containing 1 (BTBD1), ATP binding cassette subfamily E member 1 (ABCE1), and PDK1 in A549 and H1299 cells transfected with miR-NC or miR-330-5p. **P* <0.05.


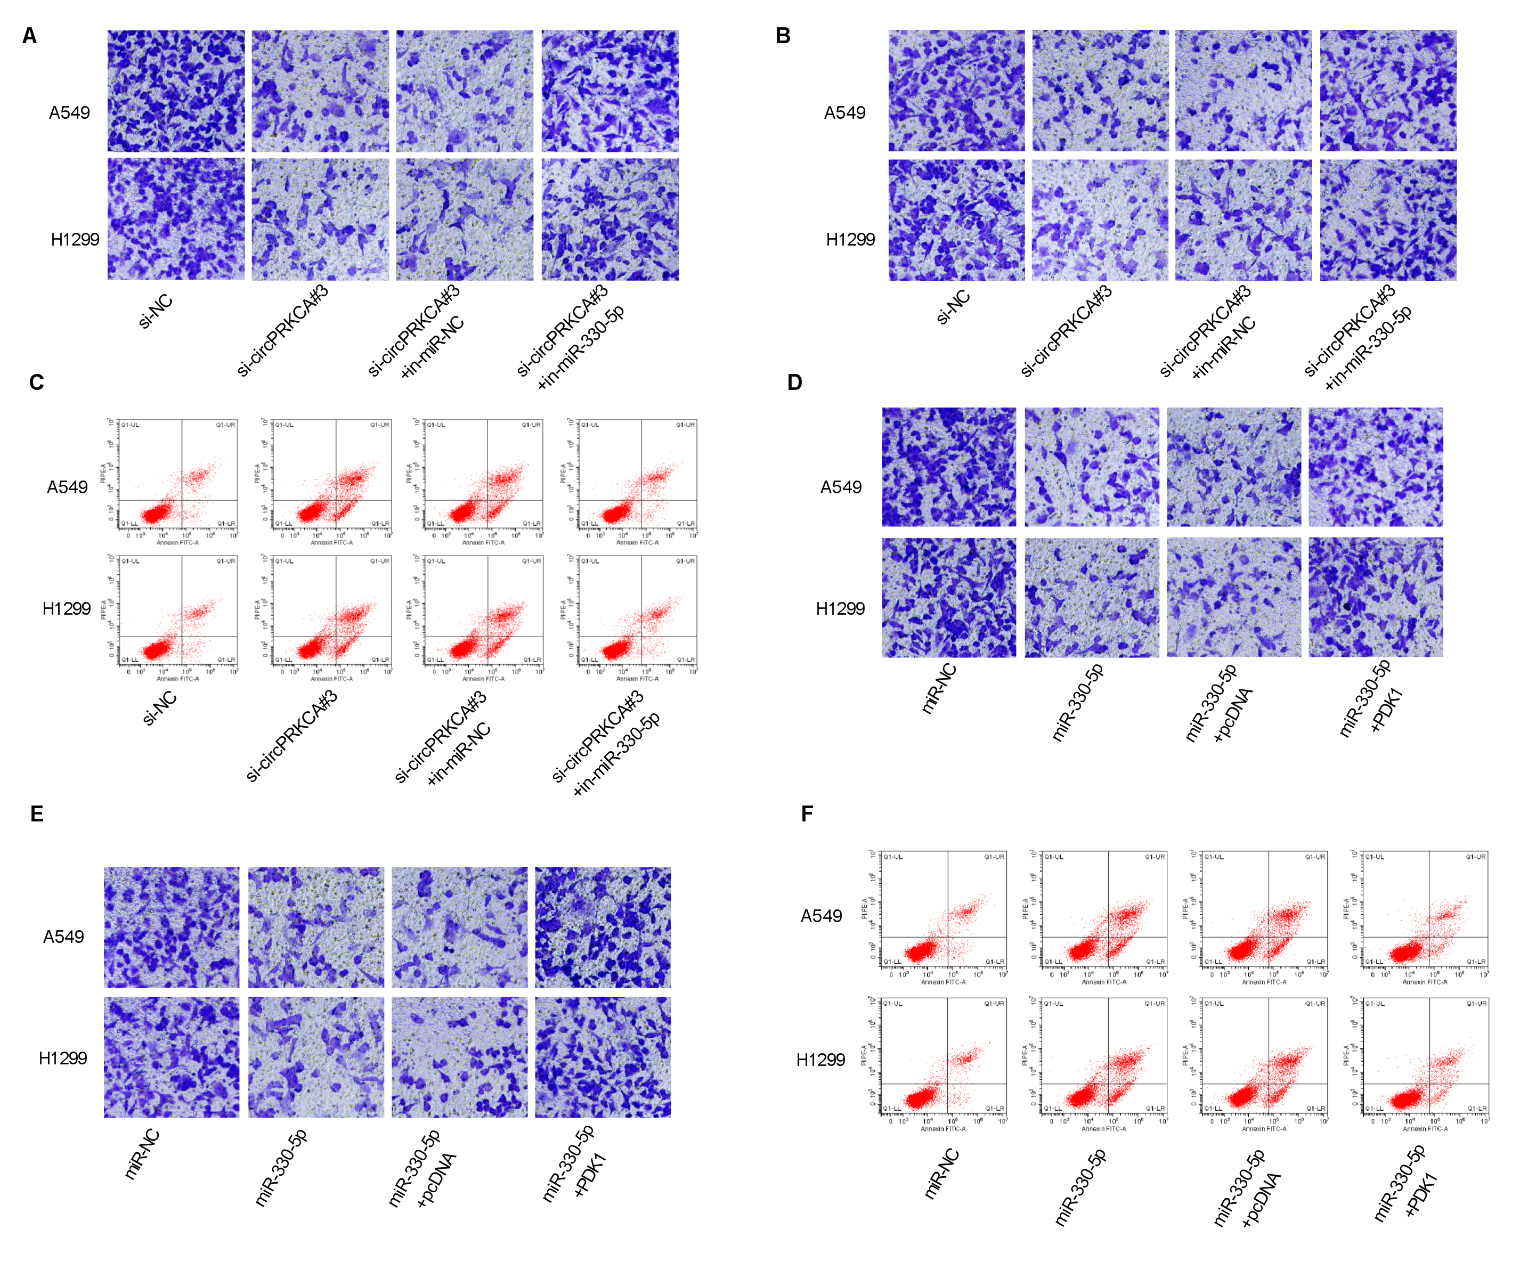

Supplement: Supplementary file 1 [file get_supplementary_file.php]
